# Supplementary material for: A Comparative Study of (Cd,Zn)S Buffer Layers for Cu(In,Ga)Se2 Solar Panels Fabricated by Chemical Bath and Surface Deposition Methods
Source: MDPI journal article supplement (doi:10.3390/ma13071622), 2020-04-01

# Supplementary Information for:

## A Comparative study of (Cd,Zn)S buffer layers for Cu(In,Ga)Se<sub>2</sub> solar panels fabricated by chemical bath and surface deposition methods

Dowon Bae<sup>1,2\*</sup>

<sup>1</sup> Delft University of Technology, Department of Chemical Engineering - Materials for Energy Conversion and Storage (MECS), Delft 2629HZ, The Netherlands; [d.bae@tudelft.nl](mailto:d.bae@tudelft.nl), [bae.dowon@yahoo.co.kr](mailto:bae.dowon@yahoo.co.kr)

<sup>2</sup> LG Innotek R&D Center, 55, Hanyang Daehak-ro, Sanggok-gu, Ansan, Gyeonggi, 426-791, Korea

\* Corresponding author

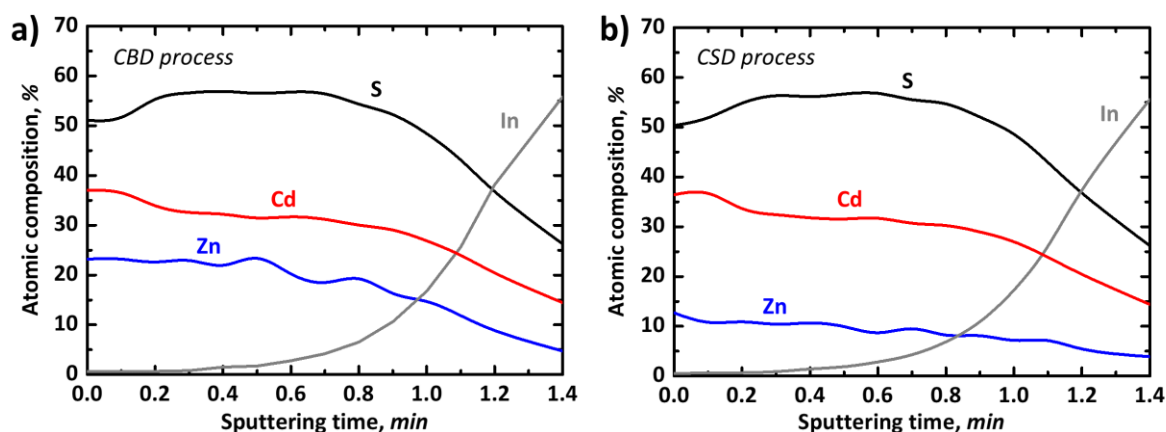

**Figure S1** AES depth profile of (Cd,Zn)S thin films grown on ITO-coated glass substrates by the CBD (a) and CSD (b) processes.

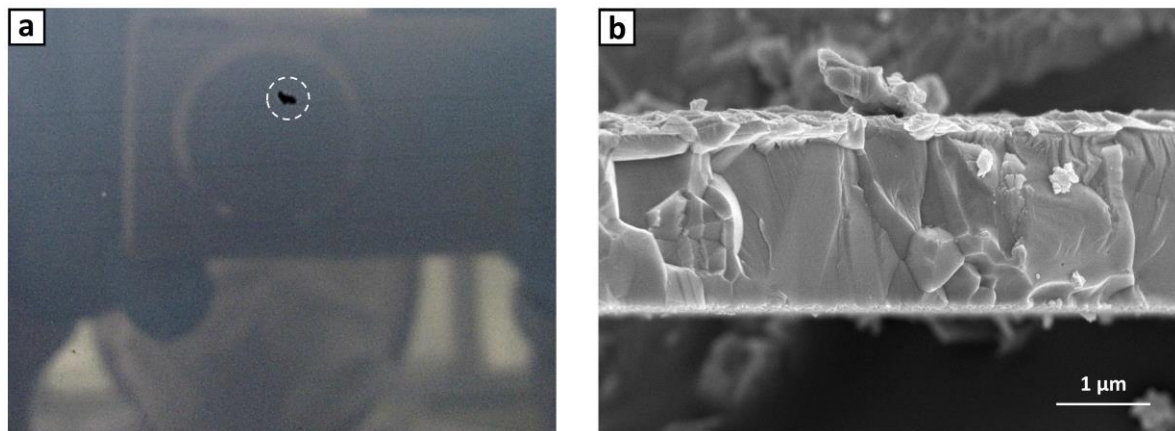

**Figure S2** CIGS panel photo after the buffer layer deposition process (a). A small piece of the sample (SEM in b) was scraped from the panel by using a razor blade (dashed circle) for the EDX measurement.

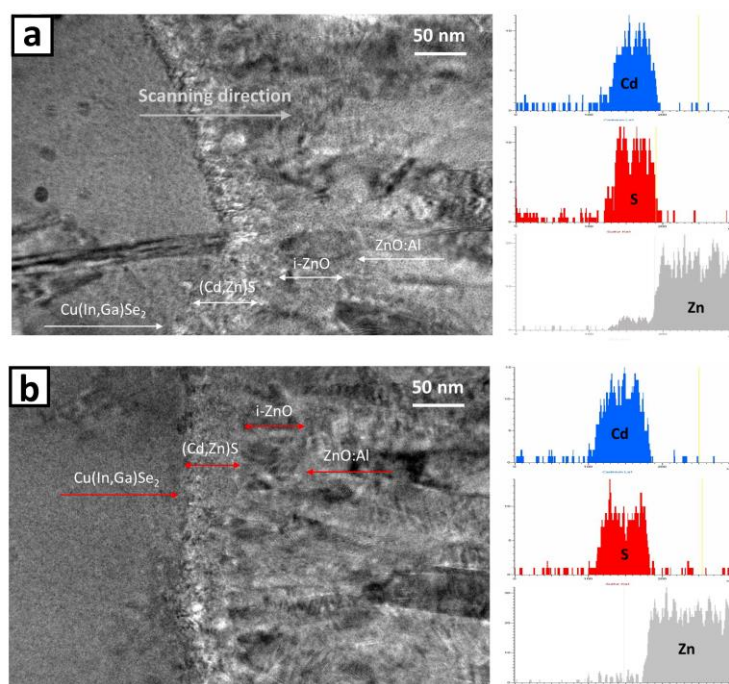

**Figure S3** TEM images of AZO/i-ZnO/(Cd,Zn)S/CIGS interfaces with buffer layers prepared by different methods (CBD – a; CSD – b). The energy-dispersive spectroscopy line-scans across the interfaces are also displayed on the right side.

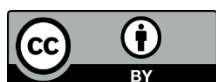

Supplement: s1 [file s1]
